# Supplementary material for: Cardiac differentiation of human pluripotent stem cells using defined extracellular matrix proteins reveals essential role of fibronectin
Source: eLife journal article supplement (doi:10.7554/elife.69028), 2022-06-07
Supplement: fig2-data1 [file Figure 2A ImagJ analysis.xlsx]

## Sheet: Sheet1
Individual	area by pixel^2	mean grey value	Std grey value	cell count	normalize to cell count
D-3	307200	0.627	1.836	51	0.0122941		Summary	area by pixel^2	mean grey value	Std grey value
	307200	0.599	1.804	44	0.0136136		d-3	297280	0.822	2.04275
	307200	0.994	2.232	52	0.0191154		d-2	297120	7.03775	1.86325
	267520	1.068	2.299	48	0.02225		d-1	297120	13.7295	3.26225
D-2	307200	6.584	1.95	78	0.0844103		d0	300213	34.058	12.2678
	307200	7.458	1.777	144	0.0517917		d0 monolayer	307200	22.8923	15.6998
	307200	6.814	1.992	57	0.119544
	266880	7.295	1.734	94	0.0776064
D-1	307200	13.169	2.773	181	0.0727569
	307200	13.105	2.53	200	0.065525
	307200	13.967	4.253	131	0.106618
	266880	14.677	3.493	169	0.0868462
D0(1)	307200	31.281	11.603	285	0.109758
	307200	27.628	10.129	253	0.109202
	307200	28.88	10.291	290	0.0995862
	265600	29.488	10.443	233	0.126558
D0(2)	307200	36.086	12.682	260	0.138792
	307200	31.605	11.915	251	0.125916
	307200	37.333	12.449	286	0.130535
	264960	37.906	12.852	245	0.154718
D0(3)	307200	36.15	8.848	265	0.136415
	307200	37.203	9.812	285	0.130537
	307200	38.885	11.116	286	0.135962
	307200	36.251	25.074	220	0.164777
D0(monolayer)	307200	22.636	12.266	231	0.0979913
	307200	18.436	11.081	268	0.068791
	307200	25.788	12.407	296	0.0871216
	307200	24.709	27.045	251	0.0984422
